# Supplementary material for: An In-Depth Process Model for Fuel Production via Hydrothermal Liquefaction and Catalytic Hydrotreating
Source: MDPI journal article supplement (doi:10.3390/pr9071172), 2021-07-05
Supplement: s1 [file s1]

# Supporting information

**Table S1.** Feedstock composition, dry-matter content and mass flow for each model component in the feed stream of the Aspen Plus® model. The considered mass flows are corrected for the mass of water that is added by the assumption that hydrolysis had already taken place. It is assumed that 80 % of the fatty acids had been bound in a triglyceride, while 20 % are free fatty acids. For carbohydrates, proteins and lignin it is assumed that 60 %, 70 % and 100 % of the model compounds had been bound in polymeric form, respectively.

| Model compound                      | Spirulina        | Sewage Sludge   | Wheat straw     |
|-------------------------------------|------------------|-----------------|-----------------|
|                                     | Mass flow [kg/h] |                 |                 |
| Water, total                        | 4.146997         | 4.069573        | 4.077998        |
| <b>Total mass, dry-matter</b>       | <b>0.853474</b>  | <b>0.902789</b> | <b>0.901593</b> |
| Dry-matter content [%]              | 17.1             | 18.2            | 18.1            |
| <b>Total mass, additional water</b> | <b>0.146890</b>  | <b>0.069466</b> | <b>0.077891</b> |
| <b>Lipids</b>                       | <b>0.011397</b>  | <b>0.079183</b> | <b>0.018849</b> |
| Myristic acid                       | 0.000274         | 0.006851        | 0.002284        |
| Pentadecylic acid                   | 0.000291         | 0.007272        | 0.002424        |
| Palmitic acid                       | 0.001026         | 0.012821        | 0.002051        |
| Oleic acid                          | 0.002259         | 0.028247        | 0.004519        |
| Arachidic acid                      | 0.005594         | 0.009376        | 0.003125        |
| Behenic acid                        | 0.001362         | 0.010218        | 0.003406        |
| Glycerol                            | 0.001114         | 0.008289        | 0.001962        |
| Hydrolysis correction: 80 %         | 0.000523         | 0.003891        | 0.000922        |
| <b>Carbohydrates</b>                | <b>0.336015</b>  | <b>0.434125</b> | <b>0.756721</b> |
| Glucose                             | 0.055848         | 0.311673        | 0.401752        |
| Xylose                              | 0.273239         | 0.110647        | 0.336294        |
| Acetic acid                         | 0.036512         | 0.046901        | 0.081671        |
| Hydrolysis correction: 60 %         | 0.029584         | 0.035096        | 0.062996        |
| <b>Proteins</b>                     | <b>0.433965</b>  | <b>0.142934</b> | <b>0.043521</b> |
| 3-mercaptopropionic acid            | 0.013162         | 0.013905        | 0.002314        |
| Glycine                             | 0.042563         | 0.012011        | 0.001937        |
| Glutamine                           | 0.082865         | 0.010026        | 0.003771        |
| Tryptophane                         | 0.115798         | 0.014010        | 0.009476        |
| Phenylalanine                       | 0.034690         | 0.026431        | 0.007665        |
| Lysine                              | 0.030700         | 0.023390        | 0.003772        |
| 2-Ethylimidazol                     | 0.045663         | 0.006595        | 0.000990        |
| Pyrrolidine                         | 0.033783         | 0.011380        | 0.001835        |
| Valeric acid                        | 0.048513         | 0.007006        | 0.001052        |
| Tyrosine                            | 0.038050         | 0.028991        | 0.014024        |
| Formic acid                         | 0.021862         | 0.003157        | 0.000474        |
| ammonia                             | 0.042576         | 0.008072        | 0.001250        |
| Hydrolysis correction: 70 %         | 0.116260         | 0.022039        | 0.005039        |

| <b>Lignin</b>                | <b>0.003522</b> | <b>0.059182</b> | <b>0.062664</b> |
|------------------------------|-----------------|-----------------|-----------------|
| 4-allyl-2-methoxyphenol      | 0.000296        | 0.005599        | 0.005928        |
| 4-hydroxybenzaldehyde        | 0.000296        | 0.005593        | 0.005923        |
| 1.2-benzenediol              | 0.000500        | 0.000500        | 0.000500        |
| Guaiacol                     | 0.000295        | 0.005586        | 0.005921        |
| Phenol                       | 0.000296        | 0.005590        | 0.005920        |
| Orcin                        | 0.000295        | 0.005598        | 0.005921        |
| Benzoic acid                 | 0.000296        | 0.005593        | 0.005923        |
| 1.2-diphenylethanol          | 0.000295        | 0.005591        | 0.005928        |
| Biphenol                     | 0.000296        | 0.005586        | 0.005921        |
| Bisphenol A                  | 0.000294        | 0.005593        | 0.005936        |
| 2.3-dihydrobenzofuran        | 0.000296        | 0.005599        | 0.005923        |
| 1.4-diphenylbutan            | 0.000294        | 0.005594        | 0.005931        |
| Diphenylether                | 0.000296        | 0.005600        | 0.005923        |
| Hydrolysis correction: 100 % | 0.000523        | 0.008440        | 0.008934        |
| <b>Extractives</b>           | <b>0.005000</b> | <b>0.014993</b> | <b>0.005000</b> |
| Phytan                       | 0.000500        | 0.001500        | 0.000500        |
| Farnesene                    | 0.000501        | 0.001500        | 0.000501        |
| Docosane                     | 0.000500        | 0.001500        | 0.000500        |
| Pentacosane                  | 0.000501        | 0.001499        | 0.000501        |
| Nonacosane                   | 0.000499        | 0.001500        | 0.000499        |
| $\alpha$ -pinene             | 0.000500        | 0.001499        | 0.000500        |
| $\beta$ -pinene              | 0.000500        | 0.001499        | 0.000500        |
| $\alpha$ -terpinene          | 0.000500        | 0.001499        | 0.000500        |
| Limonene                     | 0.000500        | 0.001499        | 0.000500        |
| Stigmasterol                 | 0.000499        | 0.001498        | 0.000499        |
| <b>Ash</b>                   | <b>0.063576</b> | <b>0.172371</b> | <b>0.014838</b> |
| Calcium oxide                | 0.001237        | 0.055548        | 0.004715        |
| Potassium oxide              | 0.014455        | 0.002843        | 0.004746        |
| Magnesium hydroxide          | 0.007606        | 0.003383        | 0.001377        |
| Sodium oxide                 | 0.005662        | 0.004138        | 0.000127        |
| ammoniumdihydrogenphosphate  | 0.033798        | 0.096938        | 0.003710        |
| Iron oxide                   | 0.000818        | 0.009521        | 0.000163        |

**Table S 2.** All model compounds, their respective component ID in the Aspen Plus ® model and their respective molecular masses.

| Component name      | Component ID | molecular weight [kg/kmol] |
|---------------------|--------------|----------------------------|
| N-HEXADECANOIC-ACID | HEXDECAC     | 256,42008                  |
| CARBON-DIOXIDE      | CO2          | 44,0087                    |
| N-PENTADECANE       | PENTDECA     | 212,41138                  |
| GLYCEROL            | GLYCERIN     | 92,09182                   |
| FORMIC-ACID         | FORMACID     | 46,02438                   |

---

|                              |          |           |
|------------------------------|----------|-----------|
| ACETALDEHYDE                 | ACEALDHY | 44,05176  |
| 1,3-PROPANEDIOL              | PROPDIOI | 76,09282  |
| WATER                        | WATER    | 18,01468  |
| HYDROGEN                     | HYDROGEN | 2,01568   |
| DEXTROSE                     | GLUCOSE  | 180,15228 |
| D-FRUCTOSE                   | FRUCTOSE | 180,15228 |
| 5-HYDROXYMETHYLFURFURAL      | 5-HYMEFU | 126,10824 |
| GLYCINE                      | GLYCINE  | 75,0653   |
| ACETIC-ACID                  | ACETIACI | 60,05076  |
| AMMONIA                      | AMMONNIA | 17,03022  |
| METHYL-AMINE                 | METHAMIN | 31,0566   |
| 3-METHYL-2,5-PIPERAZINEDIONE | MEPIPEON | 128,12762 |
| TRYPTOPHAN                   | TRYPTOP  | 204,22318 |
| SERINE                       | SERIN    | 105,09068 |
| INDOLE                       | INDOL    | 117,14718 |
| L-PHENYLALANINE              | PHENALAN | 165,18724 |
| CINNAMIC-ACID                | CINNACID | 148,15702 |
| PHENETHYLAMINE               | PHNETYAM | 121,17854 |
| 3-MERCAPTOPROPIONIC-ACID     | MECPROAC | 106,14214 |
| PROPIONIC-ACID               | PROPACID | 74,07714  |
| HYDROGEN-SULFIDE             | H2S      | 34,08068  |
| BENZENE                      | BENZENE  | 78,11124  |
| DIPHENYL                     | DIPHENYL | 154,2068  |
| DIBENZOTHIOPHENE             | DIBENTHI | 184,25612 |
| ANILINE                      | ANILINE  | 93,12578  |
| DIPHENYLAMINE                | DIPHEAMI | 169,22134 |
| DIBENZOPYRROLE               | CARBAZOL | 167,20566 |
| 4-ALLYL-2-METHOXYPHENOL      | ALLMEPHE | 164,19908 |
| P-HYDROXY-BENZALDEHYDE       | HYBENZAL | 122,11994 |
| 1,2-BENZENEDIOL              | BENZDIOL | 110,10924 |
| GUAIACOL                     | GUAIACOL | 124,13562 |
| PHENOL                       | PHENOL   | 94,11024  |
| DIBENZOFURAN                 | DIBEZOFU | 168,19012 |
| 1-PENTADECENE                | PENTDECE | 210,3957  |
| PALMITIC-ACID-AMIDE          | PALMACAM | 255,43562 |
| OLEIC-ACID                   | OLEICACI | 282,45716 |
| 8-HEPTADECENE                | 8HEPDECE | 238,44846 |
| CYCLOHEXANONE                | CYHEXNON | 98,1416   |
| CYCLOHEXANOL                 | CYHEXNOL | 100,15728 |
| CYCLOHEXENE                  | CYHEXENE | 82,1426   |
| CYCLOHEXANE                  | CYHEXANE | 84,15828  |
| NAPHTHALENE                  | NAPHTALE | 128,16972 |

---

|                             |          |           |
|-----------------------------|----------|-----------|
| PHENANTHRENE                | PHENANTR | 178,2282  |
| PYRENE                      | PYRENE   | 202,2496  |
| OXYGEN                      | OXYGEN   | 31,998    |
| CARBON-MONOXIDE             | CO       | 28,0097   |
| GLUTAMINE                   | GLUTAMIN | 146,1423  |
| GLUTARIC-ACID               | GLUTARIC | 132,11222 |
| 1,5-PENTANEDIOL             | 1:5-P-01 | 104,14558 |
| STEARIC-ACID                | STEAACID | 284,47284 |
| N-HEPTADECANE               | C17      | 240,46414 |
| 2,5-DIMETHYLTETRAHYDROFURAN | 2:5DMTHF | 100,15728 |
| INDOLE,-3-ETHYL-            | 3ETHINDO | 145,19994 |
| PROPANE                     | C3       | 44,09482  |
| ETHANE                      | C2       | 30,06844  |
| METHANE                     | C1       | 16,04206  |
| PYRAZINE                    | PYRAZINE | 80,08756  |
| OCTAHYDROINDOLE             | OCTHINDO | 125,2099  |
| STYRENE                     | STYROL   | 104,14832 |
| ETHYLBENZENE                | ETHYLBEN | 106,164   |
| N-PROPYLBENZENE             | PROPBENZ | 120,19038 |
| N-PENTANE                   | C5       | 72,14758  |
| CARBON-GRAPHITE             | CARBON   | 12,0107   |
| NITROGEN                    | NITROGEN | 28,0134   |
| ETHYLENE                    | ETHEN    | 28,05276  |
| CIS-1-PROPENYLBENZENE       | PROPENBE | 118,1747  |
| BICYCLOHEXYL                | BICYCHEX | 166,30088 |
| LYSINE                      | LYSINE   | 146,18536 |
| N-HEXANOIC-ACID             | HEXAACID | 116,15628 |
| N-PENTYLAMINE               | 1AMIPENT | 87,16212  |
| OLEAMIDE                    | OLEAMIDE | 281,4727  |
| HEXANAMIDE                  | HEXAMIDE | 115,17182 |
| ACETAMIDE                   | ACETAMID | 59,0663   |
| METHANOL                    | METHANOL | 32,04106  |
| N-PROPYL-AMINE              | PROPAMIN | 59,10936  |
| 1,4-PENTADIENE              | PENTADIE | 68,11622  |
| MONOETHANOLAMINE            | ETHAMINE | 61,08198  |
| 5-METHYLFURFURAL            | 5-METFUR | 110,10924 |
| 1,3-BENZODIAZOLE            | BENZIMID | 118,13534 |
| 1,3-DIHYDROXY-2-PROPANONE   | DIHYPRON | 90,07614  |
| 1-AMINO-2-PROPANOL          | AMIPROOL | 75,10836  |
| XYLOSE                      | XYLOSE   | 150,1269  |
| 1-PROPANOL                  | PROPANOL | 60,09382  |
| N-BUTYRIC-ACID              | BUTYACID | 88,10352  |

---

|                               |          |           |
|-------------------------------|----------|-----------|
| 3-METHYL-2-CYCLOPENTEN-1-ONE  | 3ME2CYON | 96,12592  |
| N-HEXADECANE                  | C16      | 226,43776 |
| CIS-DECALIN                   | DECALIN  | 138,24812 |
| N-HEXANE                      | C6       | 86,17396  |
| N-DECANE                      | C10      | 142,27948 |
| N-OCTANE                      | C8       | 114,22672 |
| N-DODECANE                    | C12      | 170,33224 |
| N-BUTANE                      | C4       | 58,1212   |
| N-TETRADECANE                 | C14      | 198,385   |
| N-HEPTANE                     | C7       | 100,20034 |
| N-NONANE                      | C9       | 128,2531  |
| N-UNDECANE                    | C11      | 156,30586 |
| N-TRIDECANE                   | C13      | 184,35862 |
| METHYLCYCLOPENTANE            | METCYCPE | 84,15828  |
| DIPHENYL-ETHER                | DIPHEETH | 170,2058  |
| GAMMA-VALEROLACTONE           | VALELACT | 100,11422 |
| 2-METHYLTETRAHYDROFURAN       | 2-METTHF | 86,1309   |
| CALCIUM-OXIDE                 | CALCOXID | -         |
| POTASSIUM-OXIDE               | POTAOXID | -         |
| MAGNESIUM-HYDROXIDE           | MGHYOXID | -         |
| SODIUM-OXIDE                  | SODIOXID | -         |
| AMMONIUM-DIHYDROGEN-PHOSPHATE | AMMOOXID | -         |
| N-OCTADECANE                  | C18      | 254,49052 |
| ETHANOL                       | ETHANOL  | 46,06744  |
| PROPYLENE                     | PROPEN   | 42,07914  |
| 1,3-DIHYDROXY-5-METHYLBENZENE | ORCIN    | 124,13562 |
| TRANS-RESVERATROL             | RESVERAT | 228,24088 |
| TOLUENE                       | TOLUOL   | 92,13762  |
| BENZOIC-ACID                  | BENZACID | 122,11994 |
| ACETANILIDE                   | ACETANIL | 135,16186 |
| N-PROPYLMERCAPTAN             | THIOPROP | 44,09482  |
| ACRYLIC-ACID                  | ACRYLACI | 104,12646 |
| 1-PENTANOL                    | PENTANOL | 88,14658  |
| 1,2-DIPHENYLETHANE            | DIPHETHA | 182,25956 |
| N-ETHYLANILINE                | ETHYANIL | 121,17854 |
| HEMATITE                      | FE2O3    | -         |
| 2-METHYL-BUTANE               | 2-METBUT | 72,14758  |
| 2-METHYL-PENTANE              | 2-METPEN | 86,17396  |
| 2-METHYLHEXANE                | 2-METHEX | 100,20034 |
| ETHYLCYCLOHEXANE              | ETHCYHEX | 112,21104 |
| INDOLINE                      | INDOLINE | 119,16286 |
| 1-HEXANOL                     | HEXANOL  | 102,17296 |

---

|                             |          |           |
|-----------------------------|----------|-----------|
| 1-HEPTANOL                  | HEPTANOL | 116,19934 |
| 1-ETHYL-DECALIN             | 1-ETH-DE | 166,30088 |
| 1-ETHYLNAPHTHALENE          | 1-ETH-NA | 156,22248 |
| 1-METHYL-DECALIN            | 1-MET-DE | 152,2745  |
| 1-METHYLNAPHTHALENE         | 1-MET-NA | 142,1961  |
| FLUORANTHENE                | FLUORANT | 202,2496  |
| TETRAHYDRO-2-PYRANONE       | DVALLACT | 100,11422 |
| FORMALDEHYDE                | FORMALDE | 30,02538  |
| N-NONADECANE                | C19      | 268,5169  |
| C34H16O2-N1                 | C34H16O2 | 456,48724 |
| 1,2,3,5-TETRAMETHYL-BENZENE | 1235MEBE | 134,21676 |
| 1,2,3-TRIMETHYLBENZENE      | 123MEBE  | 120,19038 |
| 1,2,4,5-TETRAMETHYLBENZENE  | 1245MEBE | 134,21676 |
| 1,2,4-TRIMETHYLBENZENE      | 124MEBE  | 120,19038 |
| 1,2-DIMETHYL-3-ETHYLBENZENE | 12M3ETBE | 134,21676 |
| 1,4-DIETHYLBENZENE          | 14ETBE   | 134,21676 |
| 1-ETHYL-2-ISOPROPYLBENZENE  | 1ET2PRBE | 148,24314 |
| 1-METHYL-2-ISOPROPYLBENZENE | 1ME2PRBE | 134,21676 |
| 1-METHYL-4-ETHYLBENZENE     | 1ME4ETBE | 120,19038 |
| M-XYLENE                    | M-XYLENE | 106,164   |
| O-XYLENE                    | O-XYLENE | 106,164   |
| P-XYLENE                    | P-XYLENE | 106,164   |
| 1-N-PENTYLNAPHTHALENE       | 1PENNAPH | 198,30162 |
| PYRROLIDINE                 | PYRROLID | 71,12006  |
| PYRIDINE                    | PYRIDINE | 79,0994   |
| S-(-)-NICOTINE              | S-NICOTI | 162,23016 |
| 4-(2-FURYL)-3-BUTEN-2-ONE   | FURBUEON | 136,14632 |
| C13H10O3-N5                 | DIFURYC5 | 214,2145  |
| FURFURAL                    | FURFURAL | 96,08286  |
| LEVULINIC-ACID              | LEVUACID | 116,11322 |
| ACETONE                     | ACETONE  | 58,07814  |
| 1H-IMIDAZOLE,-2-ETHYL-      | 2ETIMIDA | 96,12962  |
| N-EICOSANIC-ACID            | C20ACID  | 312,5256  |
| N-DOCOSANOIC-ACID           | C22ACID  | 340,57836 |
| N-DOCOSANE                  | C22      | 310,59604 |
| N-EICOSANE                  | C20      | 282,54328 |
| UREA                        | UREA     | 60,05446  |
| N-VALERIC-ACID              | VALEACID | 102,1299  |
| 2,5-DIMETHYLPYRROLIDINE     | 25DIMEPY | 99,17282  |
| 2-BUTYLPYRROLIDINE          | 2BUTPYRR | 127,22558 |
| 1,3-DIAZOLE                 | IMIDAZOL | 68,07686  |
| PYRROLE                     | PYRROLE  | 67,0887   |

---

|                                |          |           |
|--------------------------------|----------|-----------|
| PYRROLE,-2-ETHYL-              | 2ETPYRRO | 95,14146  |
| PYRROLE,-2-BUTYL-              | 2BUPYRRO | 123,19422 |
| N-BUTANOL                      | BUTANOL  | 74,1202   |
| COUMAFURYL                     | COUMAFUR | 298,28666 |
| O-HYDROXYCINNAMIC-ACID         | OH-CINAC | 164,15602 |
| COUMARIN                       | COUMARIN | 146,14134 |
| 4-HYDROXYCOUMARIN              | 4-OH-COU | 162,14034 |
| DIHYDROBENZOPYRAN              | H2BENZPY | 134,1737  |
| 2,19-DIMETHYLEICOSANE          | DIMEC20  | 310,59604 |
| NONADECANE,-3-METHYL-          | 3MEC19   | 282,54328 |
| 7-METHYLOCTADECANE             | 7MEC18   | 268,5169  |
| 1-NONADECENE                   | C19EN    | 266,50122 |
| 9-METHYLHEPTADECANE            | 9MEC17   | 254,49052 |
| 16-METHYLHEPTADECANE           | 2MEC17   | 254,49052 |
| 1,2-DICYCLOHEXYLETHANE         | 12CYC6C2 | 194,35364 |
| 2-METHYLPENTADECANE            | 2MEC15   | 226,43776 |
| 8-METHYLPENTADECANE            | 8MEC15   | 226,43776 |
| 1-HEXADECENE                   | 1-C16EN  | 224,42208 |
| 1-TRIDECENE                    | 1C13EN   | 182,34294 |
| 6-TRIDECENE                    | 6C13EN   | 182,34294 |
| 2,2,4-TRIMETHYLPENTANE         | ISOOCTAN | 114,22672 |
| 2-METHYLNONANE                 | 2MEC9    | 142,27948 |
| 2-METHYLOCTANE                 | 2MEC8    | 128,2531  |
| 2-METHYLDECANE                 | 2MEC10   | 156,30586 |
| N-PROPYLCYCLOHEXANE            | PROCYC6  | 126,23742 |
| 1,1,3-TRIMETHYLCYCLOHEXANE     | TRMECYC6 | 126,23742 |
| 1,4-DIETHYLCYCLOHEXANE         | DIETCYC6 | 140,2638  |
| 1,2,3,5-TETRAMETHYLCYCLOHEXANE | TEMECYC6 | 140,2638  |
| 2-METHYLUKADECANE              | 2MEC11   | 170,33224 |
| 3-ETHYLDECANE                  | 3ETC10   | 170,33224 |
| 1-DODECENE                     | 1C12EN   | 168,31656 |
| 6-DODECENE                     | 6C12EN   | 168,31656 |
| 7-TETRADECENE                  | 7C14EN   | 196,36932 |
| 1-TETRADECENE                  | 1C14EN   | 196,36932 |
| DECYL-ETHYL-ETHER              | C10OC2   | 186,33124 |
| 1-EICOSENE                     | 1C20EN   | 280,5276  |
| 1-DOCOSENE                     | 1C22EN   | 308,58036 |
| 1-OCTADECENE                   | 1C18EN   | 252,47484 |
| BENZYL-ETHYL-ETHER             | BEETETHE | 136,18938 |
| 1-UNDECENE                     | 1C11EN   | 154,29018 |
| 2-METHYLHEPTANE                | 2MEC7    | 114,22672 |
| CYCLOPENTANE                   | CYCC5    | 70,1319   |

---

|                                  |          |           |
|----------------------------------|----------|-----------|
| 3,5-DIMETHYLBENZOFURAN           | DIMEBEFU | 146,1844  |
| 3-COUMARANONE                    | 3COUMANO | 134,13064 |
| RETENE                           | RETENE   | 234,33372 |
| BENZO[A]PYRENE                   | BENAPREN | 252,30808 |
| 9,10-DIMETHYLANTHRACENE          | DIMEANTH | 206,28096 |
| CORONENE                         | CORONENE | 300,35088 |
| OVALENE                          | OVALENE  | 398,45216 |
| N-TETRADECANOIC-ACID             | C14ACID  | 226,37502 |
| PENTADECANOIC-ACID               | C15ACID  | 242,3937  |
| TYROSINE                         | TYROSINE | 181,18624 |
| BENZENEETHANOL,-.ALPHA.-PHENYL-  | DIPHC2OL | 198,25856 |
| P,P*-BIPHENOL                    | 44BIPHOL | 186,2048  |
| BISPHENOL-A                      | BISPHENA | 228,28394 |
| 2,3-DIHYDROBENZOFURAN            | 23H2BEFU | 120,14732 |
| BUTANE,-1,4-DIPHENYL-            | DIPHENC4 | 210,31232 |
| C20H42-N2                        | PHYTAN   | 282,54328 |
| .ALPHA.-FARNESENE                | FARNESEN | 204,34866 |
| N-PENTACOSANE                    | C25      | 352,67518 |
| N-NONACOSANE                     | C29      | 408,7807  |
| ALPHA-PINENE                     | A-PINENE | 136,23244 |
| BETA-PINENE                      | B-PINENE | 136,23244 |
| ALPHA-TERPINENE                  | TERPINEN | 136,23244 |
| D-LIMONENE                       | LIMONENE | 136,23244 |
| STIGMASTEROL                     | STIGMAST | 412,68562 |
| SITOSTEROL                       | SITOSTER | 414,7013  |
| SERYL-SERYL-ANHYDRIDE            | SERSERAN | 174,152   |
| PIPERAZINE,-2,5-DIMETHYL-        | PI25DIME | 114,18736 |
| 2-METHYL-2-PHENYLTETRAHYDROFURAN | 2M2PHTHF | 162,22646 |
| PYRUVIC-ALDEHYDE                 | PYRUVALD | 72,06146  |
| GLYCOL-ALDEHYDE                  | GLYCOALD | 60,05076  |
| ACETOL                           | OHACETON | 74,07714  |
| LACTIC-ACID                      | LACTACID | 90,07614  |
| MYRISTIC-AMIDE                   | C14AMIDE | 227,38286 |
| N-BUTYL-AMINE                    | C4AMINE  | 73,13574  |
| N-BUTYLTETRADECANAMIDE           | C14C4AMI | 283,48838 |
| N-HEXYLAMINE                     | C6AMINE  | 101,1885  |
| N-PENTYLAMINE                    | C5AMINE  | 87,16212  |
| N-HEXYLTETRADECANAMIDE           | C14C6AMI | 311,54114 |
| N-HEXYLHEXADECANAMIDE            | C16C6AMI | 339,5939  |
| DOCOSANAMIDE                     | C22AMIDE | 339,5939  |
| N-PENTADECYLBENZENE              | C15BENZE | 288,50694 |
| ETHYL-AMINE                      | C2AMINE  | 31,07628  |



---

|                                |          |           |
|--------------------------------|----------|-----------|
| 4-METHYLUNDECANE               | 4-METC11 | 170,33224 |
| 2-PHENYLPENTANE                | 2-PHEC5  | 148,24314 |
| FARNESANE                      | FARNESAN | 212,41138 |
| BICYCLO[4.3.0]NONANE           | BICYCLC9 | 124,22174 |
| 3-METHYL-3-ETHYLHEPTANE        | 3ME2ETC7 | 142,27948 |
| DIHYDROBENZOPYRAN              | DIHBENPY | 134,1737  |
| ALPHA-TOCOPHEROL               | TOCOPHER | 430,7003  |
| 9-METHYLANTHRACENE             | 9-MEANTH | 192,25458 |
| 2-PENTYLFURAN                  | 2-C5FURA | 138,20506 |
| 2-PHENYL-4-METHYLFURAN         | 2PH4MEFU | 158,1951  |
| 2-PROPYL-4-METHYLFURAN         | 2PR4MEFU | 124,17868 |
| 2-TERT-BUTYLFURAN              | 2BUTFURA | 124,17868 |
| C12H20O-N3                     | BIIC4FU  | 180,2842  |
| 2,2,7,7-TETRAMETHYLOCTANE      | 2277TMC8 | 170,33224 |
| 2,2-DIMETHYLHEXANE             | 22DIMEC6 | 114,22672 |
| BENZENE,-ISOPENTYL-            | BENISC5  | 148,24314 |
| N-UNDECYLBENZENE               | C11BENZE | 232,40142 |
| 1-AMINOOCCTADECANE             | C18AMINE | 269,50506 |
| N-OCTYLAMINE                   | C8AMINE  | 129,24126 |
| DODECANOL                      | C12OL    | 186,33124 |
| 1-TETRADECANOL                 | C14OL    | 214,384   |
| 2,3-DIMETHYLPYRAZINE           | 23DIMEPY | 80,12692  |
| 2,3,5-TRIMETHYLPYRAZINE        | 235TMEPY | 122,1667  |
| LIGUSTRAZINE                   | TETMEPYR | 136,19308 |
| 9,10-DIHYDROPHENANTHRENE       | 9,10HPHE | 180,24388 |
| 1,2,3,4-TETRAHYDROPHENANTHRENE | 1234HPHE | 182,25956 |
| C14H16-N28                     | 6HPHENAN | 184,27524 |
| C14H18-N19                     | 8HPHENAN | 186,29092 |
| PHENANTHRENE,-TETRADECAHYDRO-  | 14HPHENA | 192,33796 |
| SEC-BUTYLBENZENE               | 2BUTBENZ | 134,21676 |
| PYRIDINE,-3-BUTYL-             | 3BUTPYRI | 135,20492 |
| 4-METHYLOCTANE                 | 4METHYC8 | 128,2531  |
| 1-METHYL-3-ISOPROPYLBENZENE    | 3IPROTOL | 134,21676 |
| 2,2-DIPHENYL-PROPANE           | 22DIPHC3 | 196,28594 |
| (-)-(1S)-CIS-PINANE            | CISPINAN | 138,24812 |
| P-MENTHANE                     | PMENTHAN | 140,2638  |
| PIPERAZINE,-2,5-DIMETHYL-      | 25DIMEPI | 114,18736 |
| 4-METHYLOCTANE                 | 4METC8   | 128,2531  |
| 1-ETHYL-2-METHYLCYCLOHEXANE    | 1E2MCYC6 | 126,23742 |
| N-OCTYLBENZENE                 | C8BENZEN | 190,32228 |
| P-XYLENE,-2-OCTYL-             | PXYLOLC8 | 218,37504 |
| BENZENE,-1,2-DIMETHYL-4-OCTYL- | OXYLOLC8 | 218,37504 |

---

|                                  |          |           |
|----------------------------------|----------|-----------|
| METHYL-ETHYL-KETONE              | C4ONE    | 72,10452  |
| 2,5-HEXANEDIONE                  | C6DIONE  | 114,1406  |
| 2,6-HEPTANEDIONE                 | C7DIONE  | 128,16698 |
| CYCLOPENTANONE                   | CYCC5ONE | 84,11522  |
| 2-METHYLCYCLOPENTANONE           | MECC5ONE | 98,1416   |
| 2-ETHYL-2-CYCLOPENTENONE         | C2CC5EON | 110,1523  |
| BENZOFURAN                       | BENZOFUR | 118,13164 |
| 2-METHYLBENZOFURAN               | MEBENFUR | 132,15802 |
| 2-INDANONE                       | INDANONE | 132,15802 |
| 2-COUMARONE                      | COUMARON | 134,13064 |
| HYDROXYHYDROQUINONE              | TRIOHBEN | 126,10824 |
| P-HYDROQUINONE                   | 14OHBENZ | 110,10924 |
| GAMMA-BUTYROLACTONE              | BUTYLACT | 86,08784  |
| 2-PYRROLIDONE                    | PYRLIDON | 85,10338  |
| ISOQUINOLINE                     | ISOQUINO | 129,15788 |
| BENZO[F]ISOQUINOLINE             | BENISOQU | 179,21636 |
| ISOQUINOLINE,-3-METHYL-          | MEISOQUI | 143,18426 |
| 1,2,3,4-TETRAHYDROQUINOLINE      | 4HQUINOL | 133,18924 |
| QUINOLINE                        | QUINOLIN | 129,15788 |
| BENZOYLENEUREA                   | BENZUREA | 162,14404 |
| QUINAZOLINE                      | QUINAZOL | 130,14604 |
| QUINOXALINE                      | QUINOXAL | 130,14604 |
| 2,3-DIMETHYLQUINOXALINE          | DIMEQUOX | 158,1988  |
| 9H-PYRIDO[3,4-B]INDOLE           | NORHARMA | 168,19382 |
| PHENANTHRIDINE                   | PHENATHR | 179,21636 |
| BENZOPYRAZOLE                    | BENZPYRA | 118,13534 |
| 3-INDAZOLINONE                   | INDAZNON | 134,13434 |
| 1,7-PHENANTHROLINE               | PHENATRO | 180,20452 |
| 5-PHENYLACRIDINE                 | PHEACRID | 255,31192 |
| ACRIDINE                         | ACRIDINE | 179,21636 |
| PHENOXAZINE                      | PHENOXAZ | 183,20466 |
| CAFFEINE                         | CAFFEIN  | 194,1888  |
| ETHYLCYCLOPENTANE                | ETHCYC5  | 98,18466  |
| 1-METHYL-2-ETHYLBENZENE          | 1ME2ETBE | 120,19038 |
| 1-METHYL-2-ETHYLNAPHTHALENE      | 1ME2ETNA | 170,24886 |
| INDANE                           | INDANE   | 118,1747  |
| N-PENTYLBENZENE                  | C5BENZEN | 148,24314 |
| 2-METHYL-BIPHENYL                | 2-MEBIPH | 168,23318 |
| 1,3-DIPROPYLBENZENE              | 13PROBEN | 162,26952 |
| 1,1*-BIPHENYL,-4-(PHENYLMETHYL)- | BENZBIPH | 244,32874 |
| CHRYSENE                         | CHRYSENE | 228,28668 |
| TETRAPHENYLPORPHINE              | 4PHPORPH | 614,7328  |

---

|                                  |          |            |
|----------------------------------|----------|------------|
| DIPHENYLMETHANE                  | DIPHENC1 | 168,23318  |
| PERYLENE,-3-HEXYL-               | C6PERYLE | 336,46636  |
| OXYPHENISATIN-ACETATE            | OXYPHENI | 401,40746  |
| N-PALMITOYL-PYRAZINAMIDE         | C16NPYRA | 361,5172   |
| PROGESTERONE                     | PROGESTE | 314,4579   |
| BETA-CHOLESTEROL                 | CHOLESTE | 386,64854  |
| 5-ALPHA-CHOLESTANE               | CHOLESTA | 372,66522  |
| PREGNANE                         | PREGNANE | 288,50694  |
| N-BENZYLOLEAMIDE                 | BENC18AM | 357,58794  |
| QUERCETIN                        | QUERCETI | 302,2319   |
| 3,6-DIMETHYL-2,5-PIPERAZINEDIONE | DIMEPION | 142,154    |
| TRIPHENYLMETHANE                 | TRIPHME  | 244,32874  |
| DIBENZYLMETHANE                  | 13DIPHC3 | 196,28594  |
| 1,4-DIPHENYLHEXANE               | DIPHENC6 | 236,3494   |
| 2,6-DIISOPROPYLNAPHTHALENE       | DIC3NAPH | 212,328    |
| 1-CYCLOPENTENE,-3,4-DIPHENYL-    | CYC5DIPH | 220,30734  |
| ANTHRAQUINONE                    | ANTHRAQU | 136,14632  |
| ANTHRACENE,-TETRADECAHYDRO-      | 14HANTHR | 192,33796  |
| METHYLCYCLOHEXANE                | METHCYC6 | 98,18466   |
| CIS-1,2-DIMETHYLCYCLOHEXANE      | 12DMCYC6 | 112,21104  |
| CIS-1,3-DIMETHYLCYCLOHEXANE      | 13DMCYC6 | 112,21104  |
| CIS-1,4-DIMETHYLCYCLOHEXANE      | 14DMCYC6 | 112,21104  |
| QUINOLINE,-DECAHYDRO-,-TRANS-    | H10QUINO | 139,23628  |
| EPSILON-CAPROLACTAM              | ECAPROLA | 113,15614  |
| ACRIDINE,-1,7-DIAMINO-           | NH3ACRID | 209,24544  |
| HEXAPHENYLMELAMINE               | 6PHEMELA | 582,6927   |
| .ALPHA.-PERHYDROACRIDINE         | PERHACRI | 193,32612  |
| PERHYDROPYRENE                   | PERHPYRE | 218,37504  |
| METHANE,-TRICYCLOHEXYL-          | TRCYC6ME | 262,46986  |
| 2,2,4,7,7-PENTAMETHYLOCTANE      | PENMEOCT | 184,35862  |
| 1,1-DIMETHYLPERHYDROPHENANTHRENE | DIMEPHPH | 220,39072  |
| 2,35-HEXATRIACONTANEDIONE        | C36H70O2 | 534,932    |
| 16-HENTRIACONTANONE              | C31H62O  | 450,81678  |
| ALL-TRANS-LYCOPENE               | C40H56   | 536,86704  |
| 3-PENTADECYL-2-DOCOSANE          | C37H74   | 518,97606  |
| DOHEPTACONTANE                   | C72H146  | 1011,91504 |
| 1-DOTRIACONTANOL                 | C32H66O  | 466,85884  |
| DOHEXACONTANE                    | C62H126  | 871,65124  |
| 1-DECANAMINE,-N-DECYL-           | C10NC10  | 297,55782  |
| 1-ICOSANAMINE                    | C20N     | 297,55782  |
| 1-HEXADECANAMINE,-N-HEXADECYL-   | C16NC16  | 465,87438  |

---

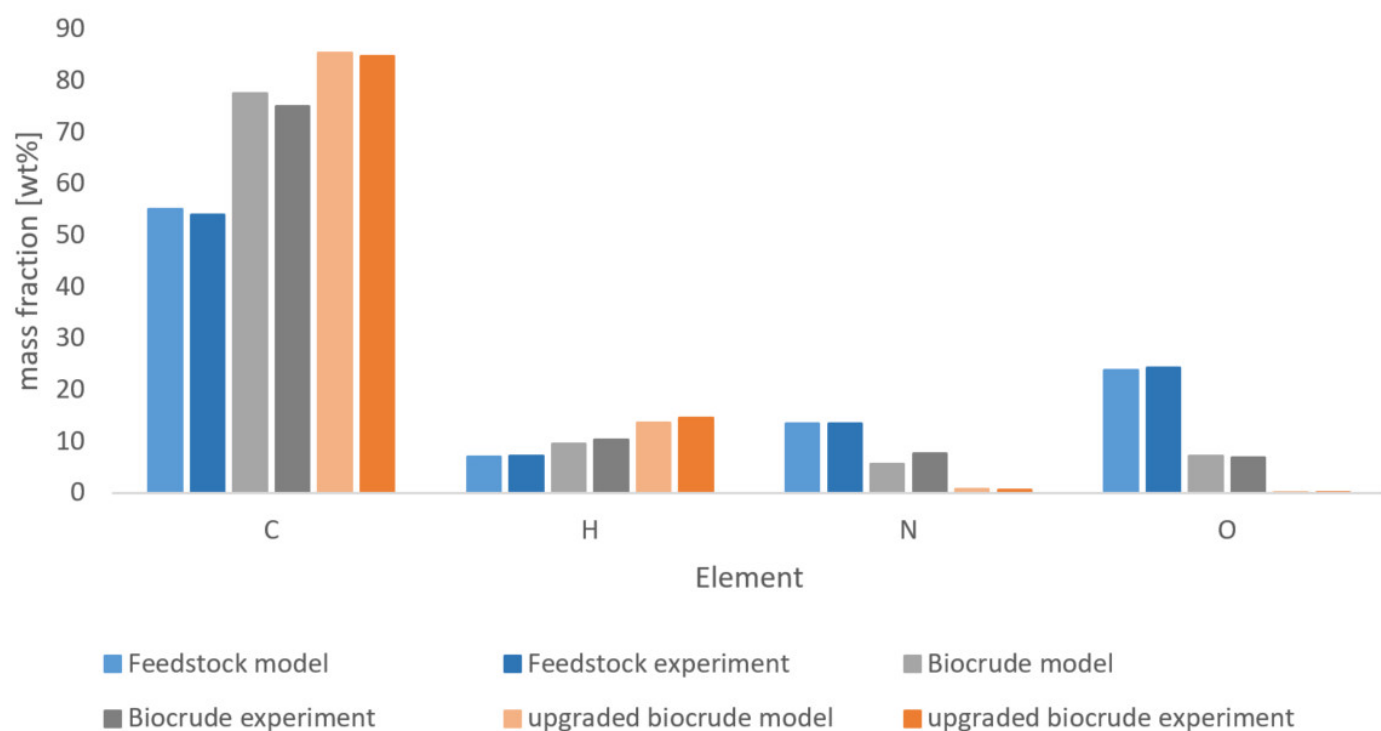

**Figure S1.** Elemental analysis of feedstock, biocrude and upgraded biocrude for Spirulina.

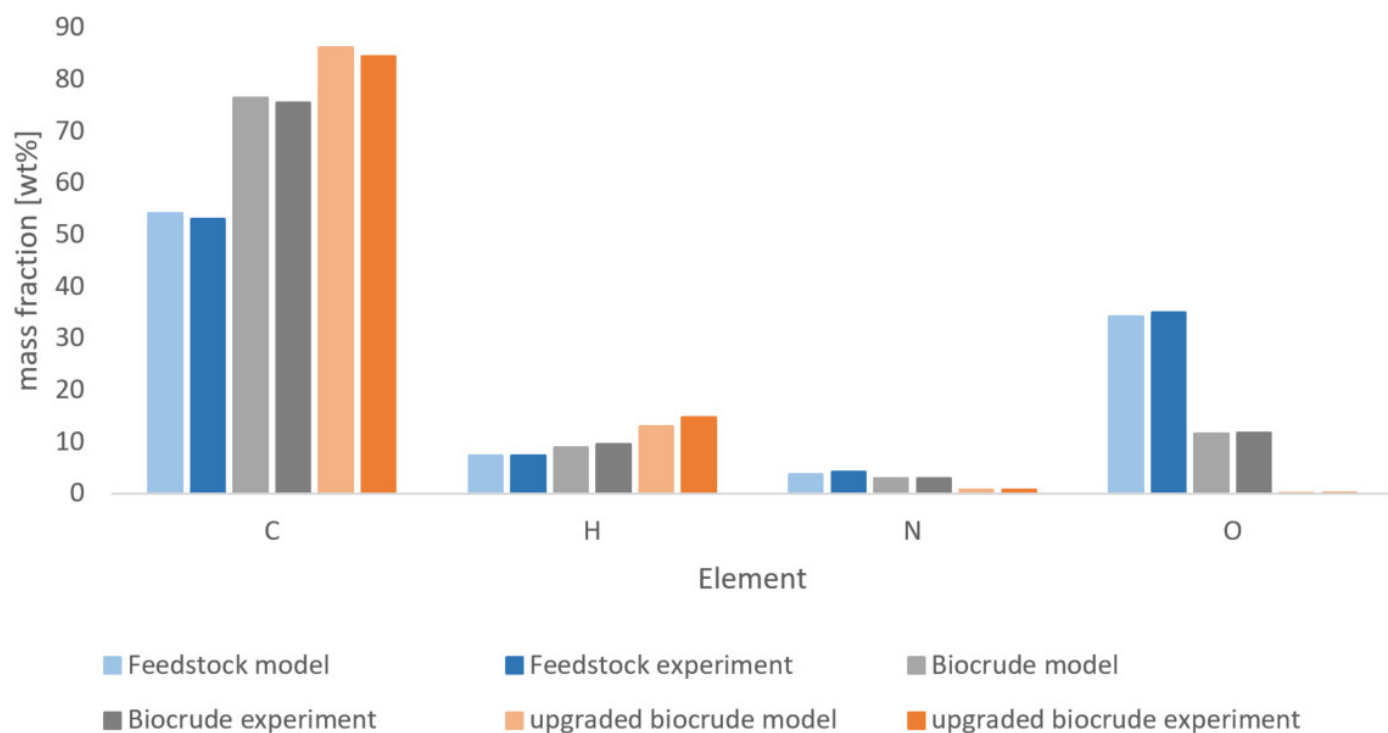

**Figure S2.** Elemental analysis of feedstock, biocrude and upgraded biocrude for sewage sludge.

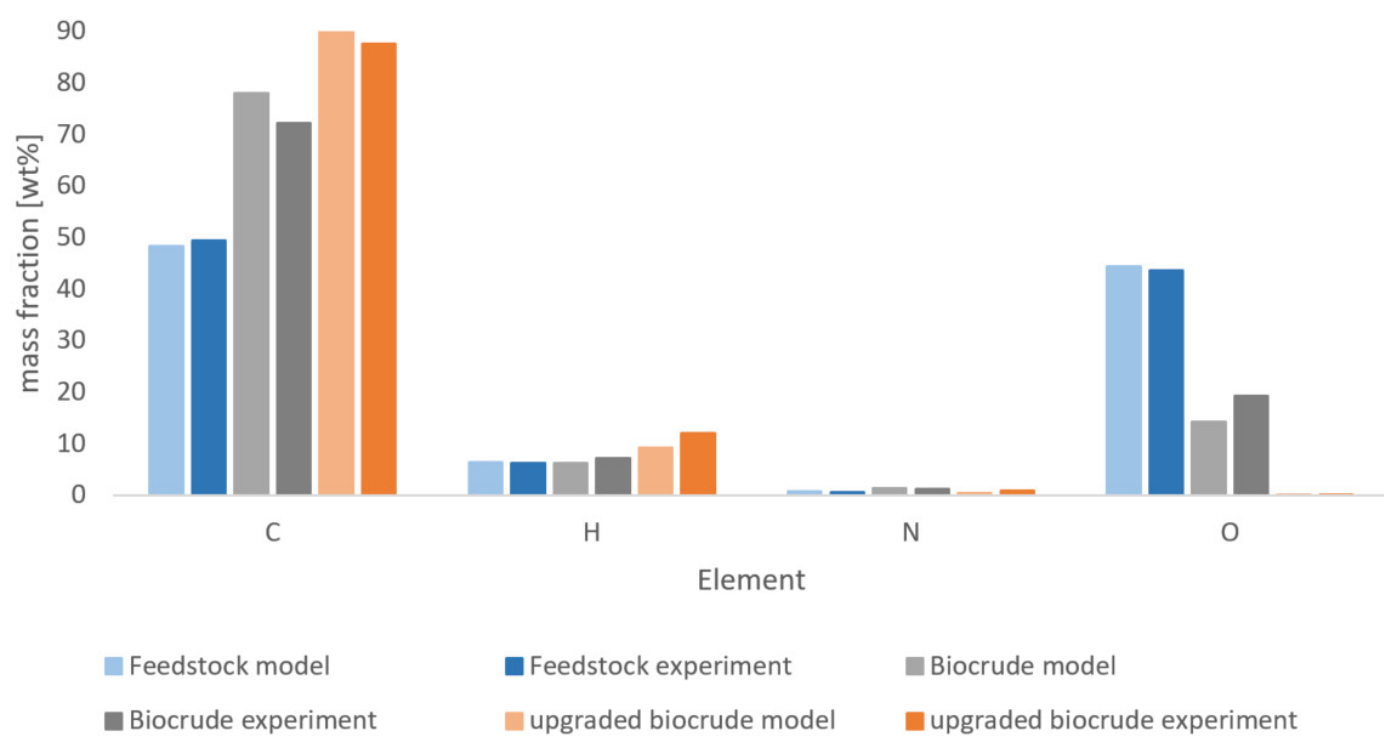

**Figure S3.** Elemental analysis of feedstock, biocrude and upgraded biocrude for wheat straw.
